# Supplementary material for: Identification of miRNAs associated with Aspergillus flavus infection and their targets in groundnut (Arachis hypogaea L.)
Source: Springer Nature journal article supplement (doi:10.1186/s12870-025-06322-2), 2025-03-17

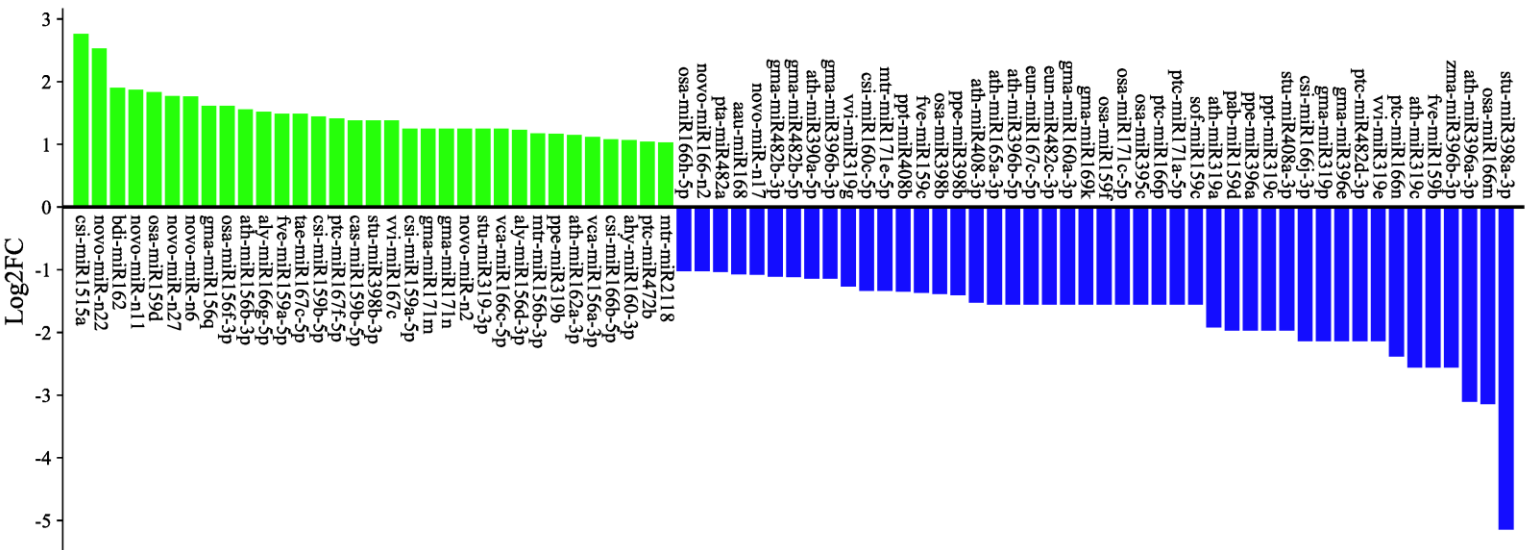

(A)

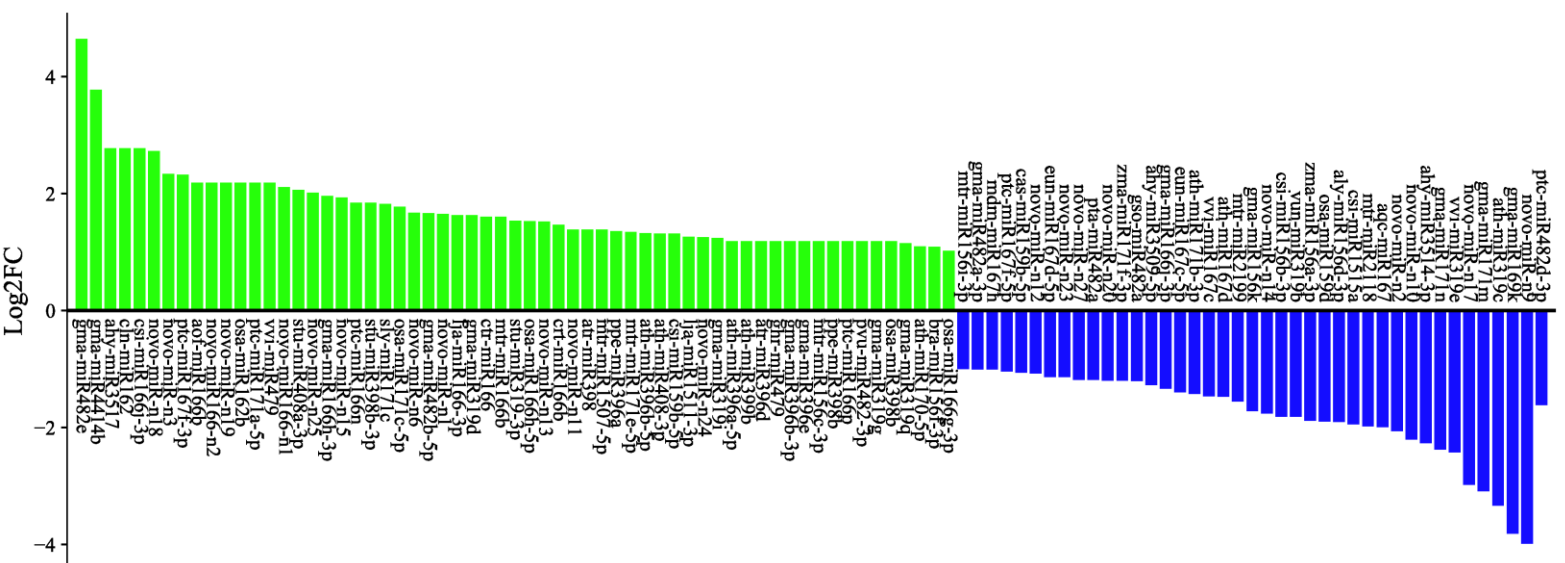

(B)

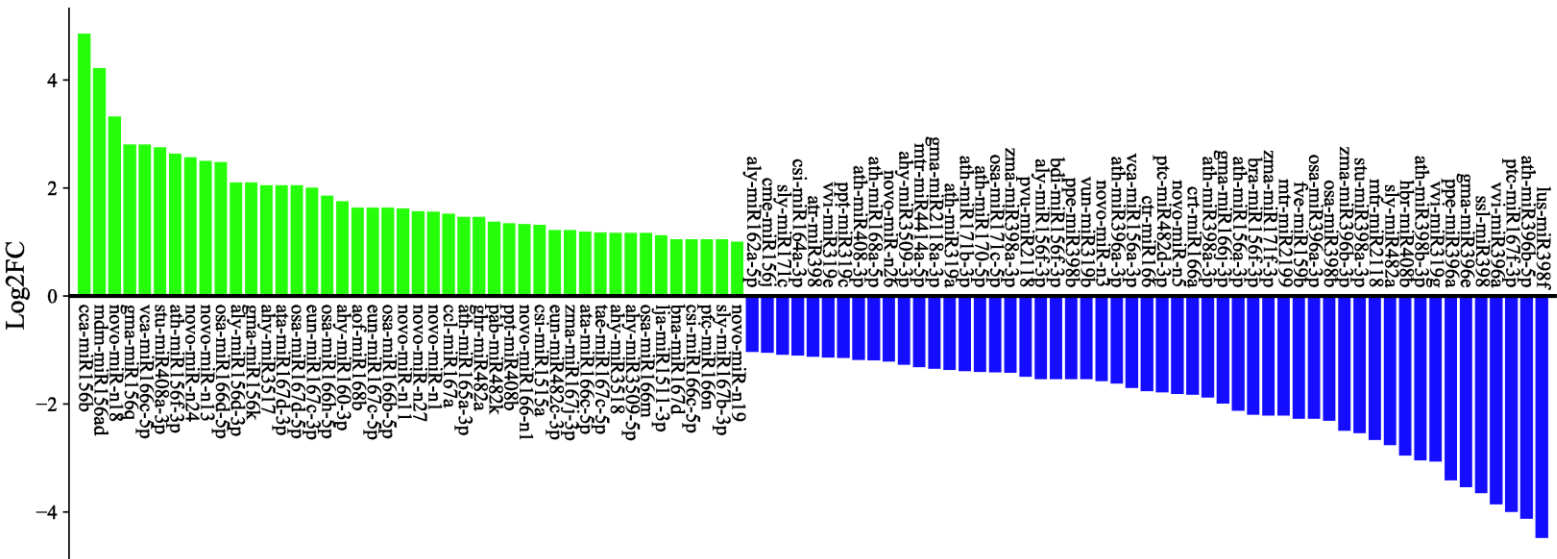

(C)

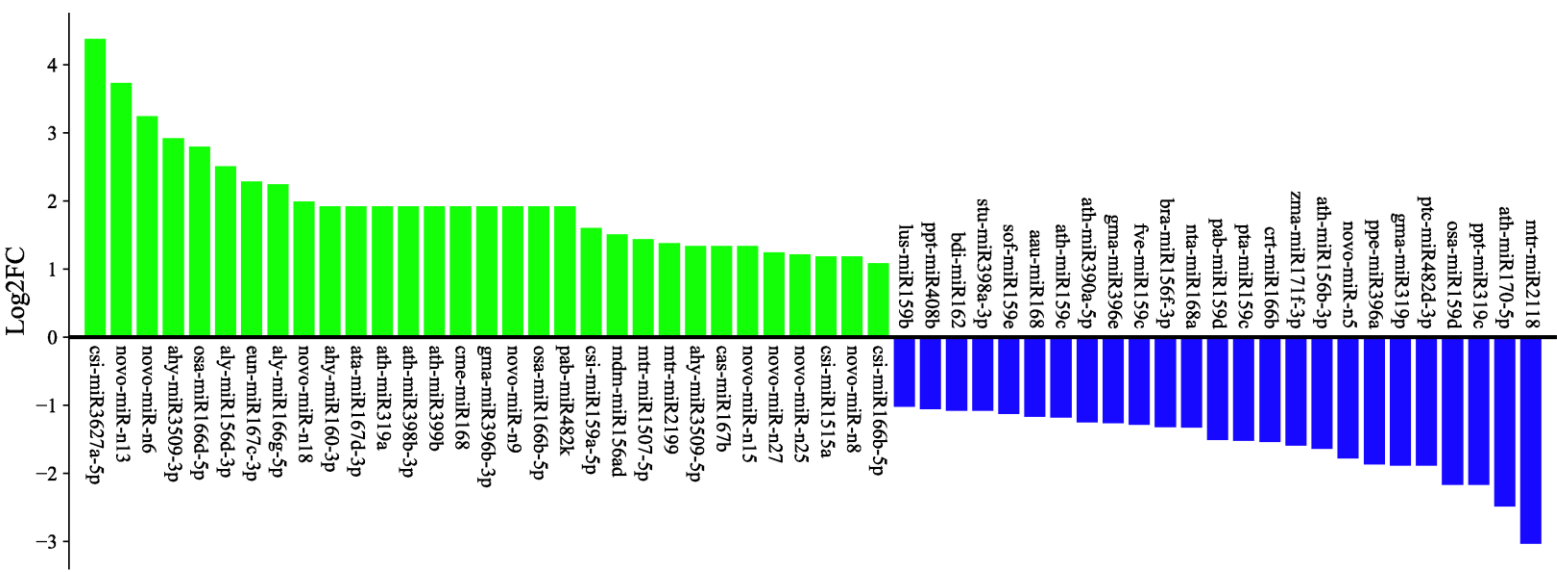

(D)

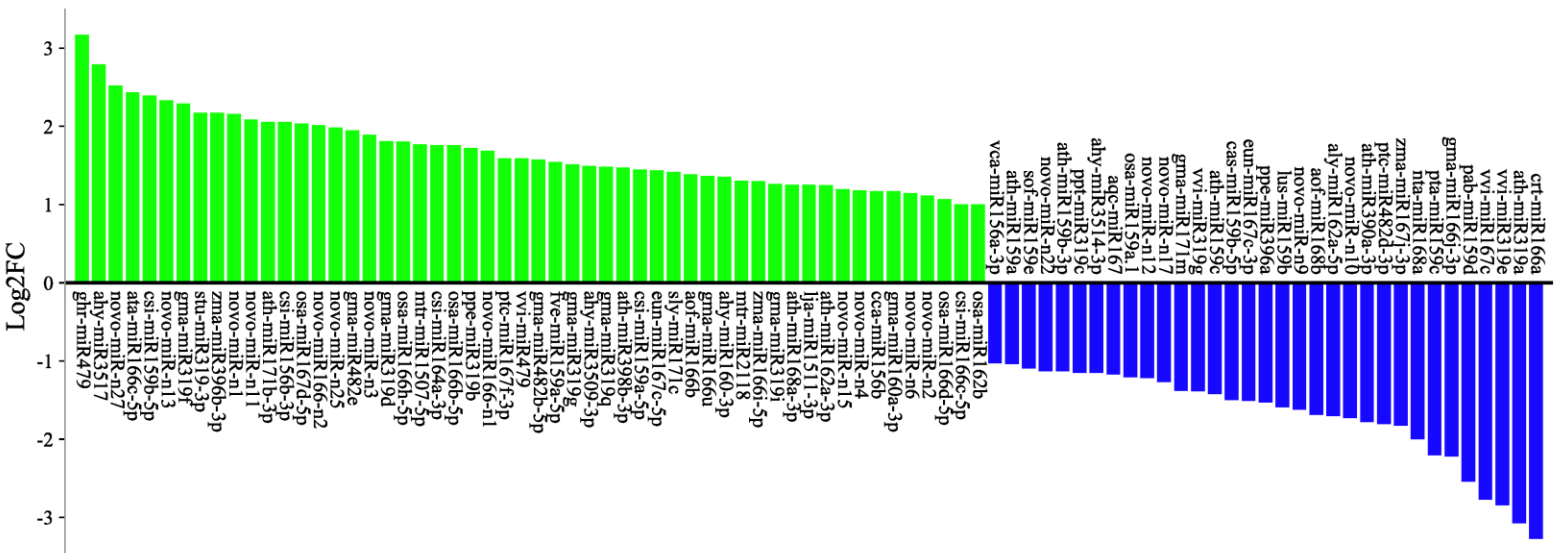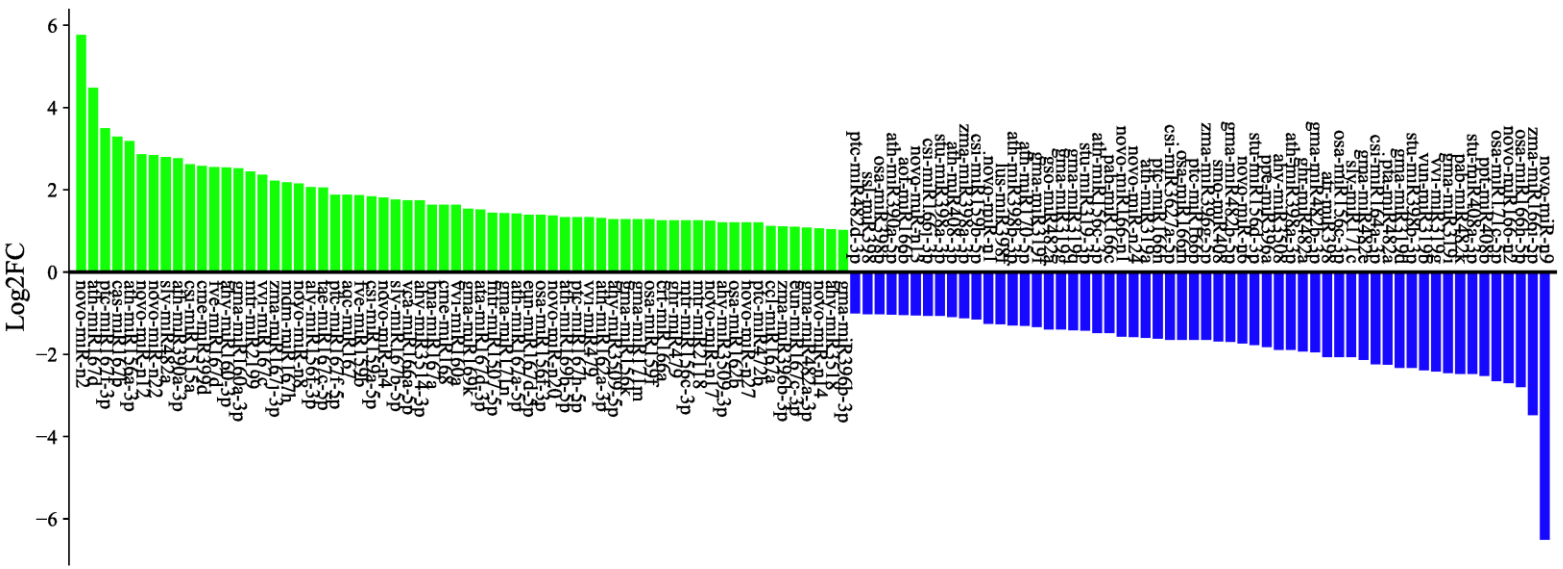

(G)

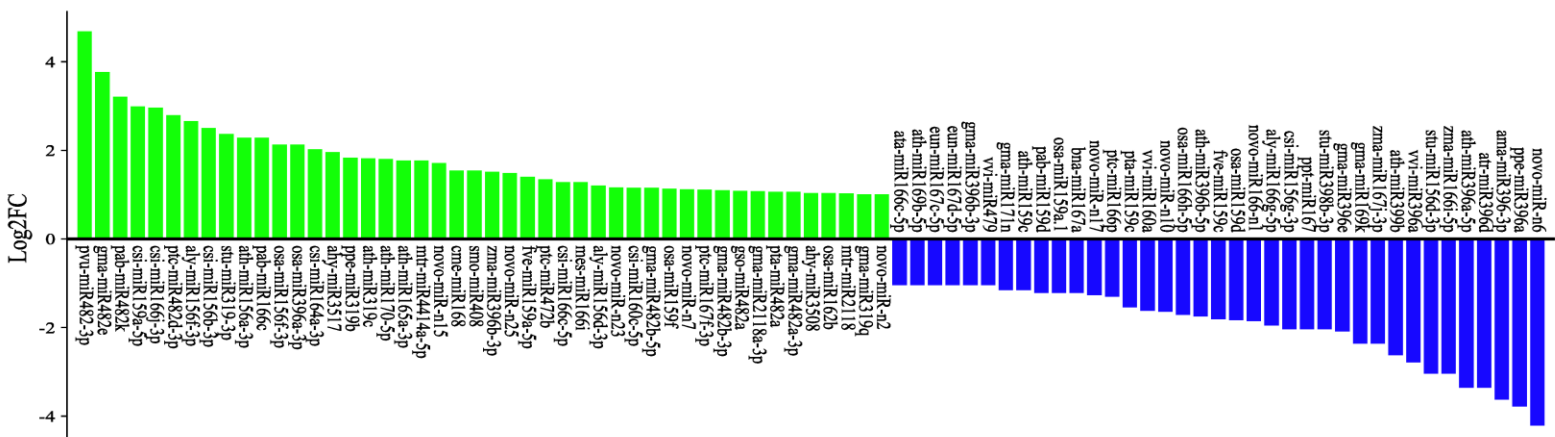

(H)

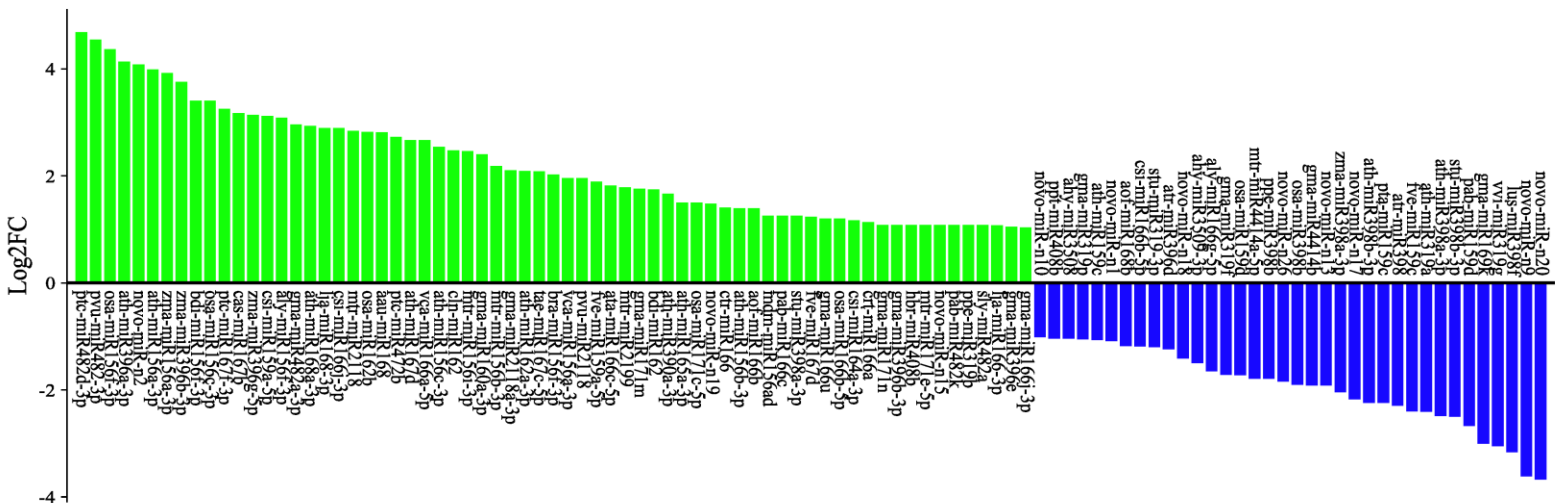

Supplement: MOESM2 [file 12870_2025_6322_MOESM2_ESM.pdf]
